# Supplementary material for: A target Capture Probe Set Useful for Deep- and Shallow-Level Phylogenetic Studies in Cactaceae
Source: MDPI journal article supplement (doi:10.3390/genes13040707), 2022-04-17
Supplement: s1 [file s1]

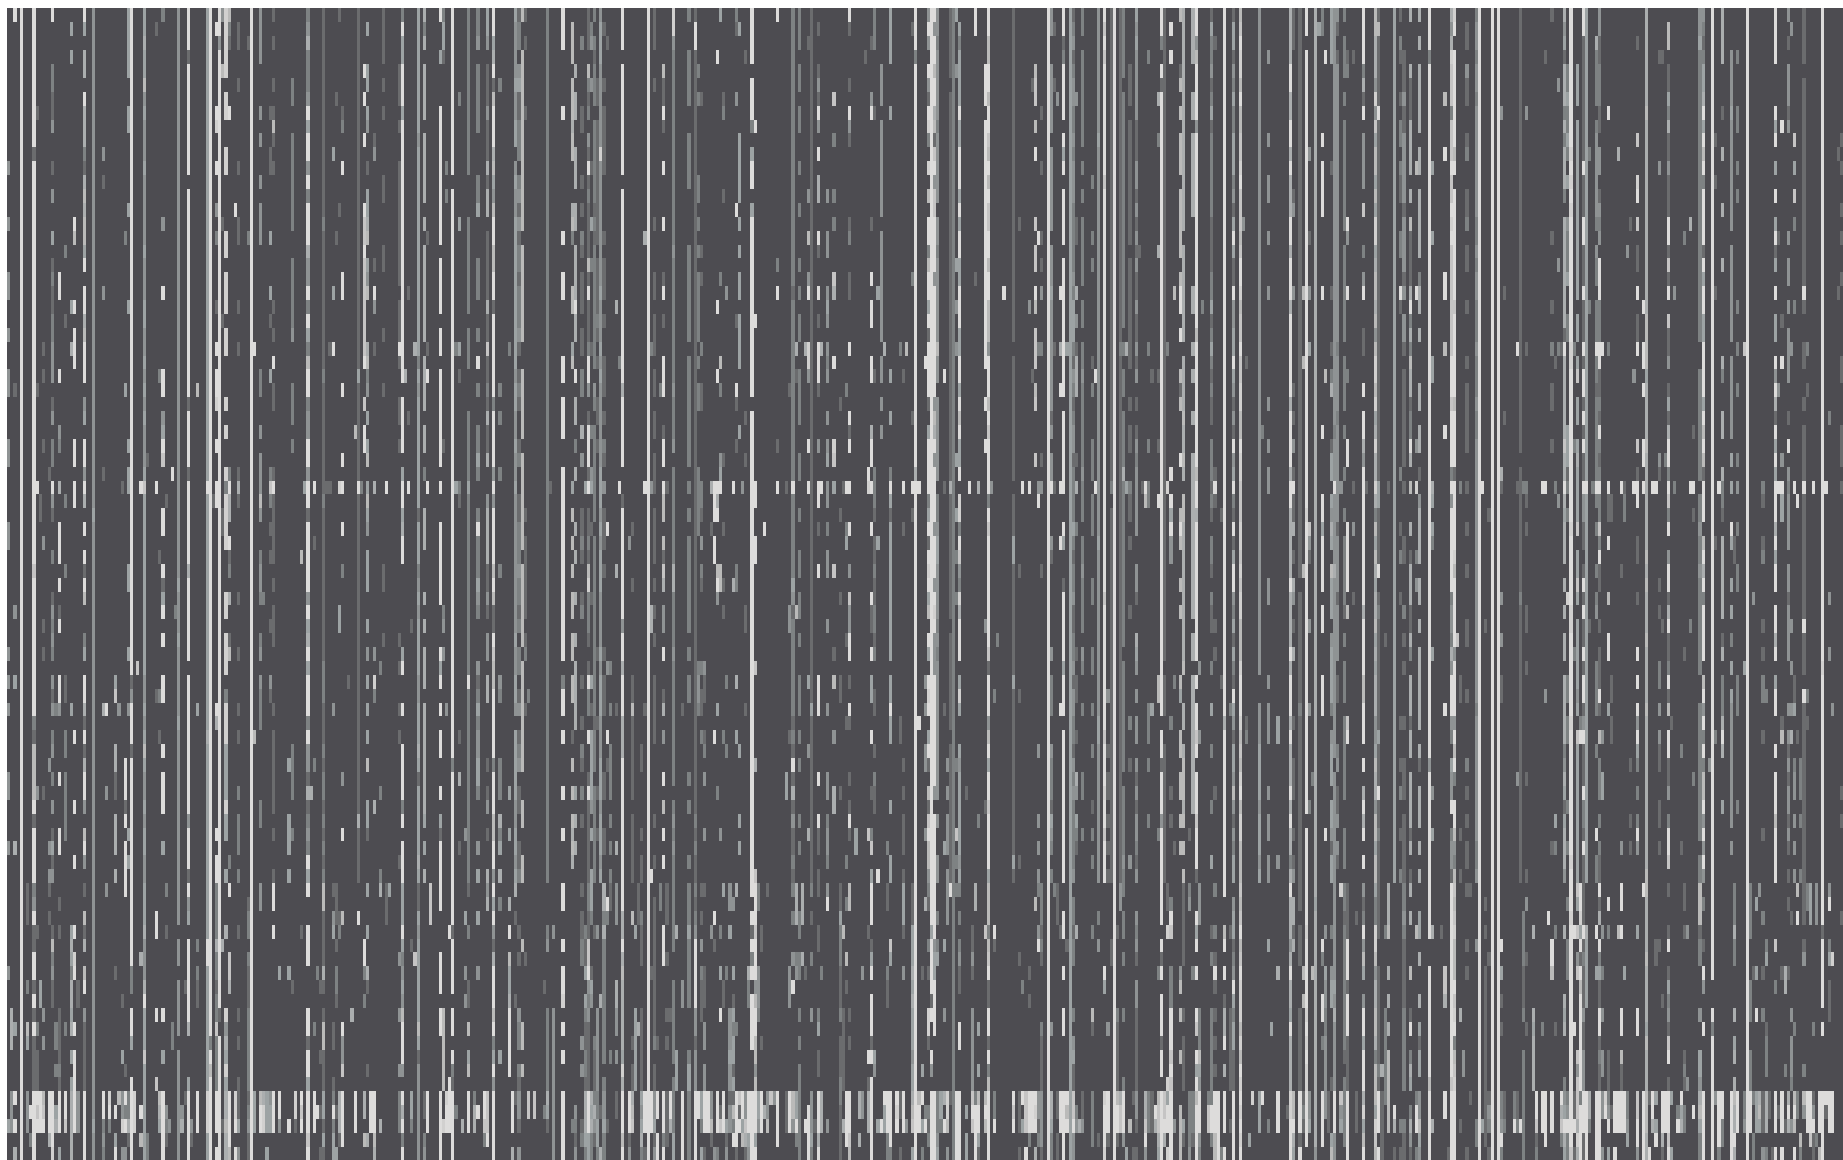

tribe Cereeae

tribe Notocactaeae

tribe Rhipsalideae

Core Cactoideae I

tribe Cacteae

Opuntioideae

Pereskioideae

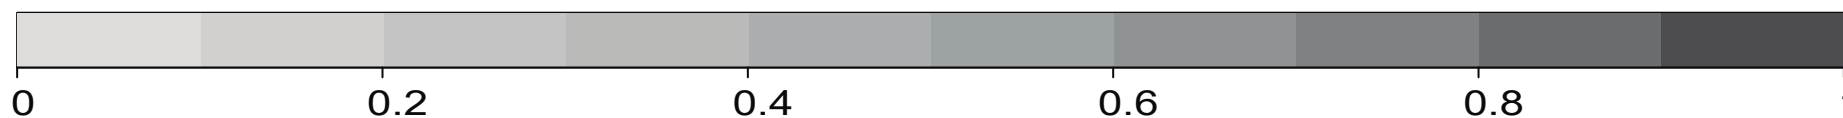

0

0.2

0.4

0.6

0.8

1

Percent Reference Protein Length Recovered
