# Supplementary figures and images for: A target Capture Probe Set Useful for Deep- and Shallow-Level Phylogenetic Studies in Cactaceae
Source: MDPI journal article supplement (doi:10.3390/genes13040707), 2022-04-17

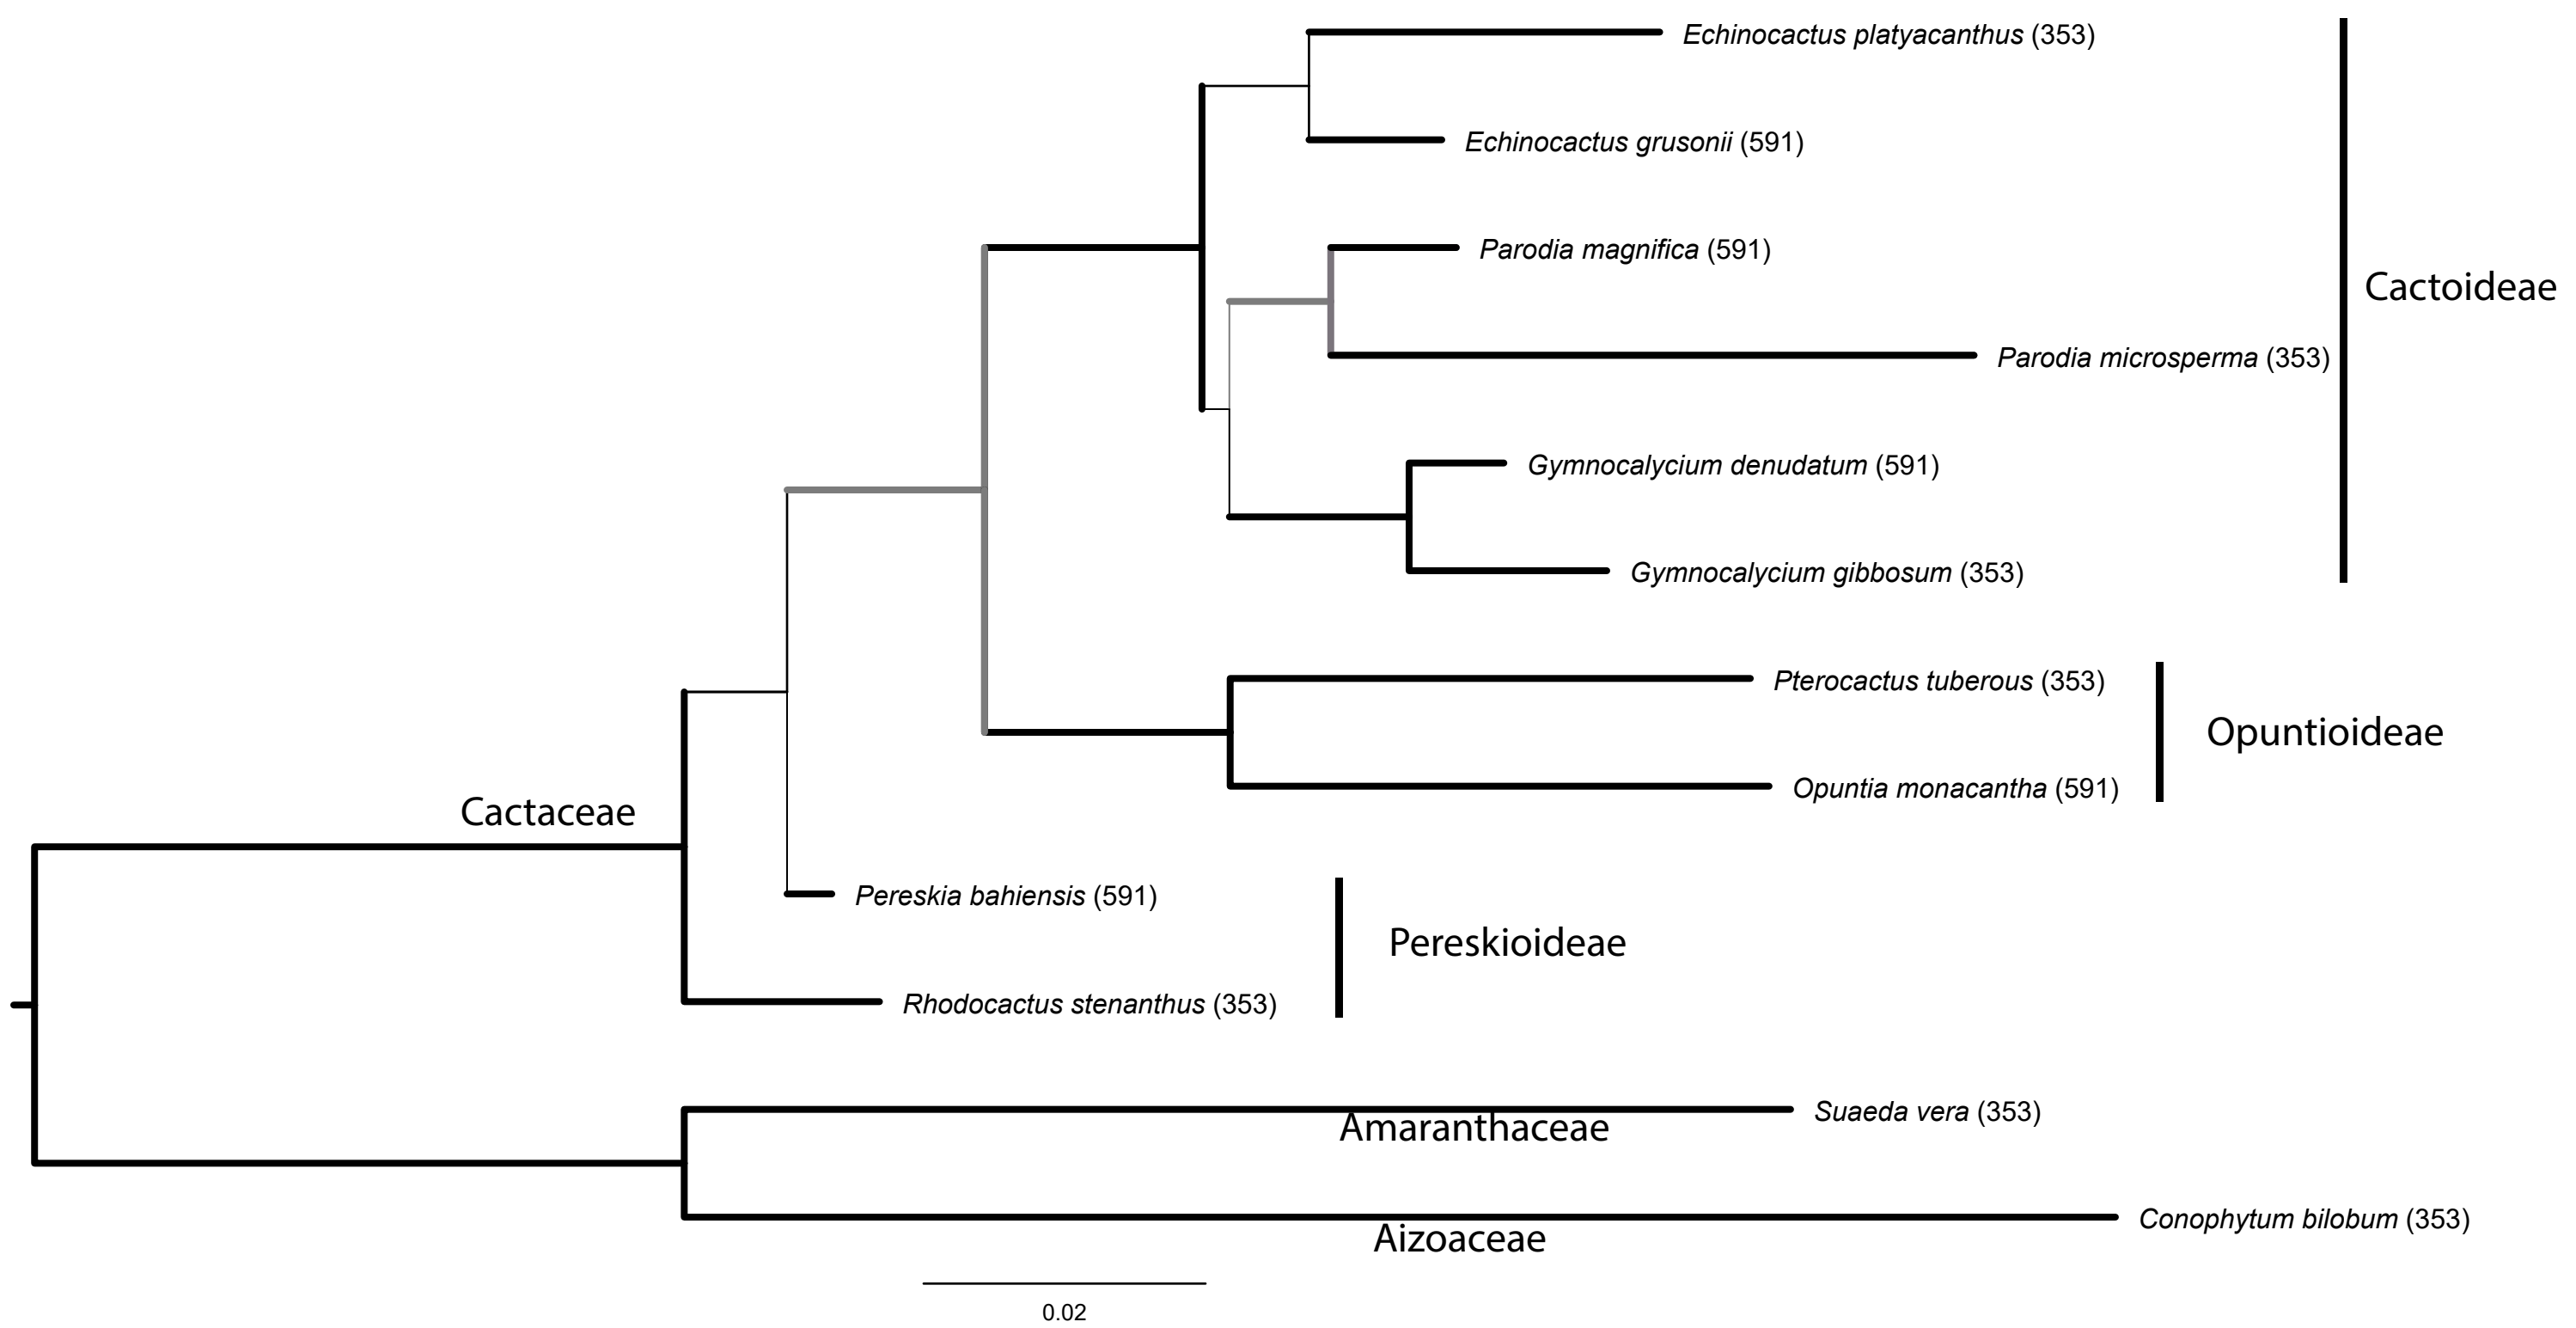

Supplement: s1 [file s1]

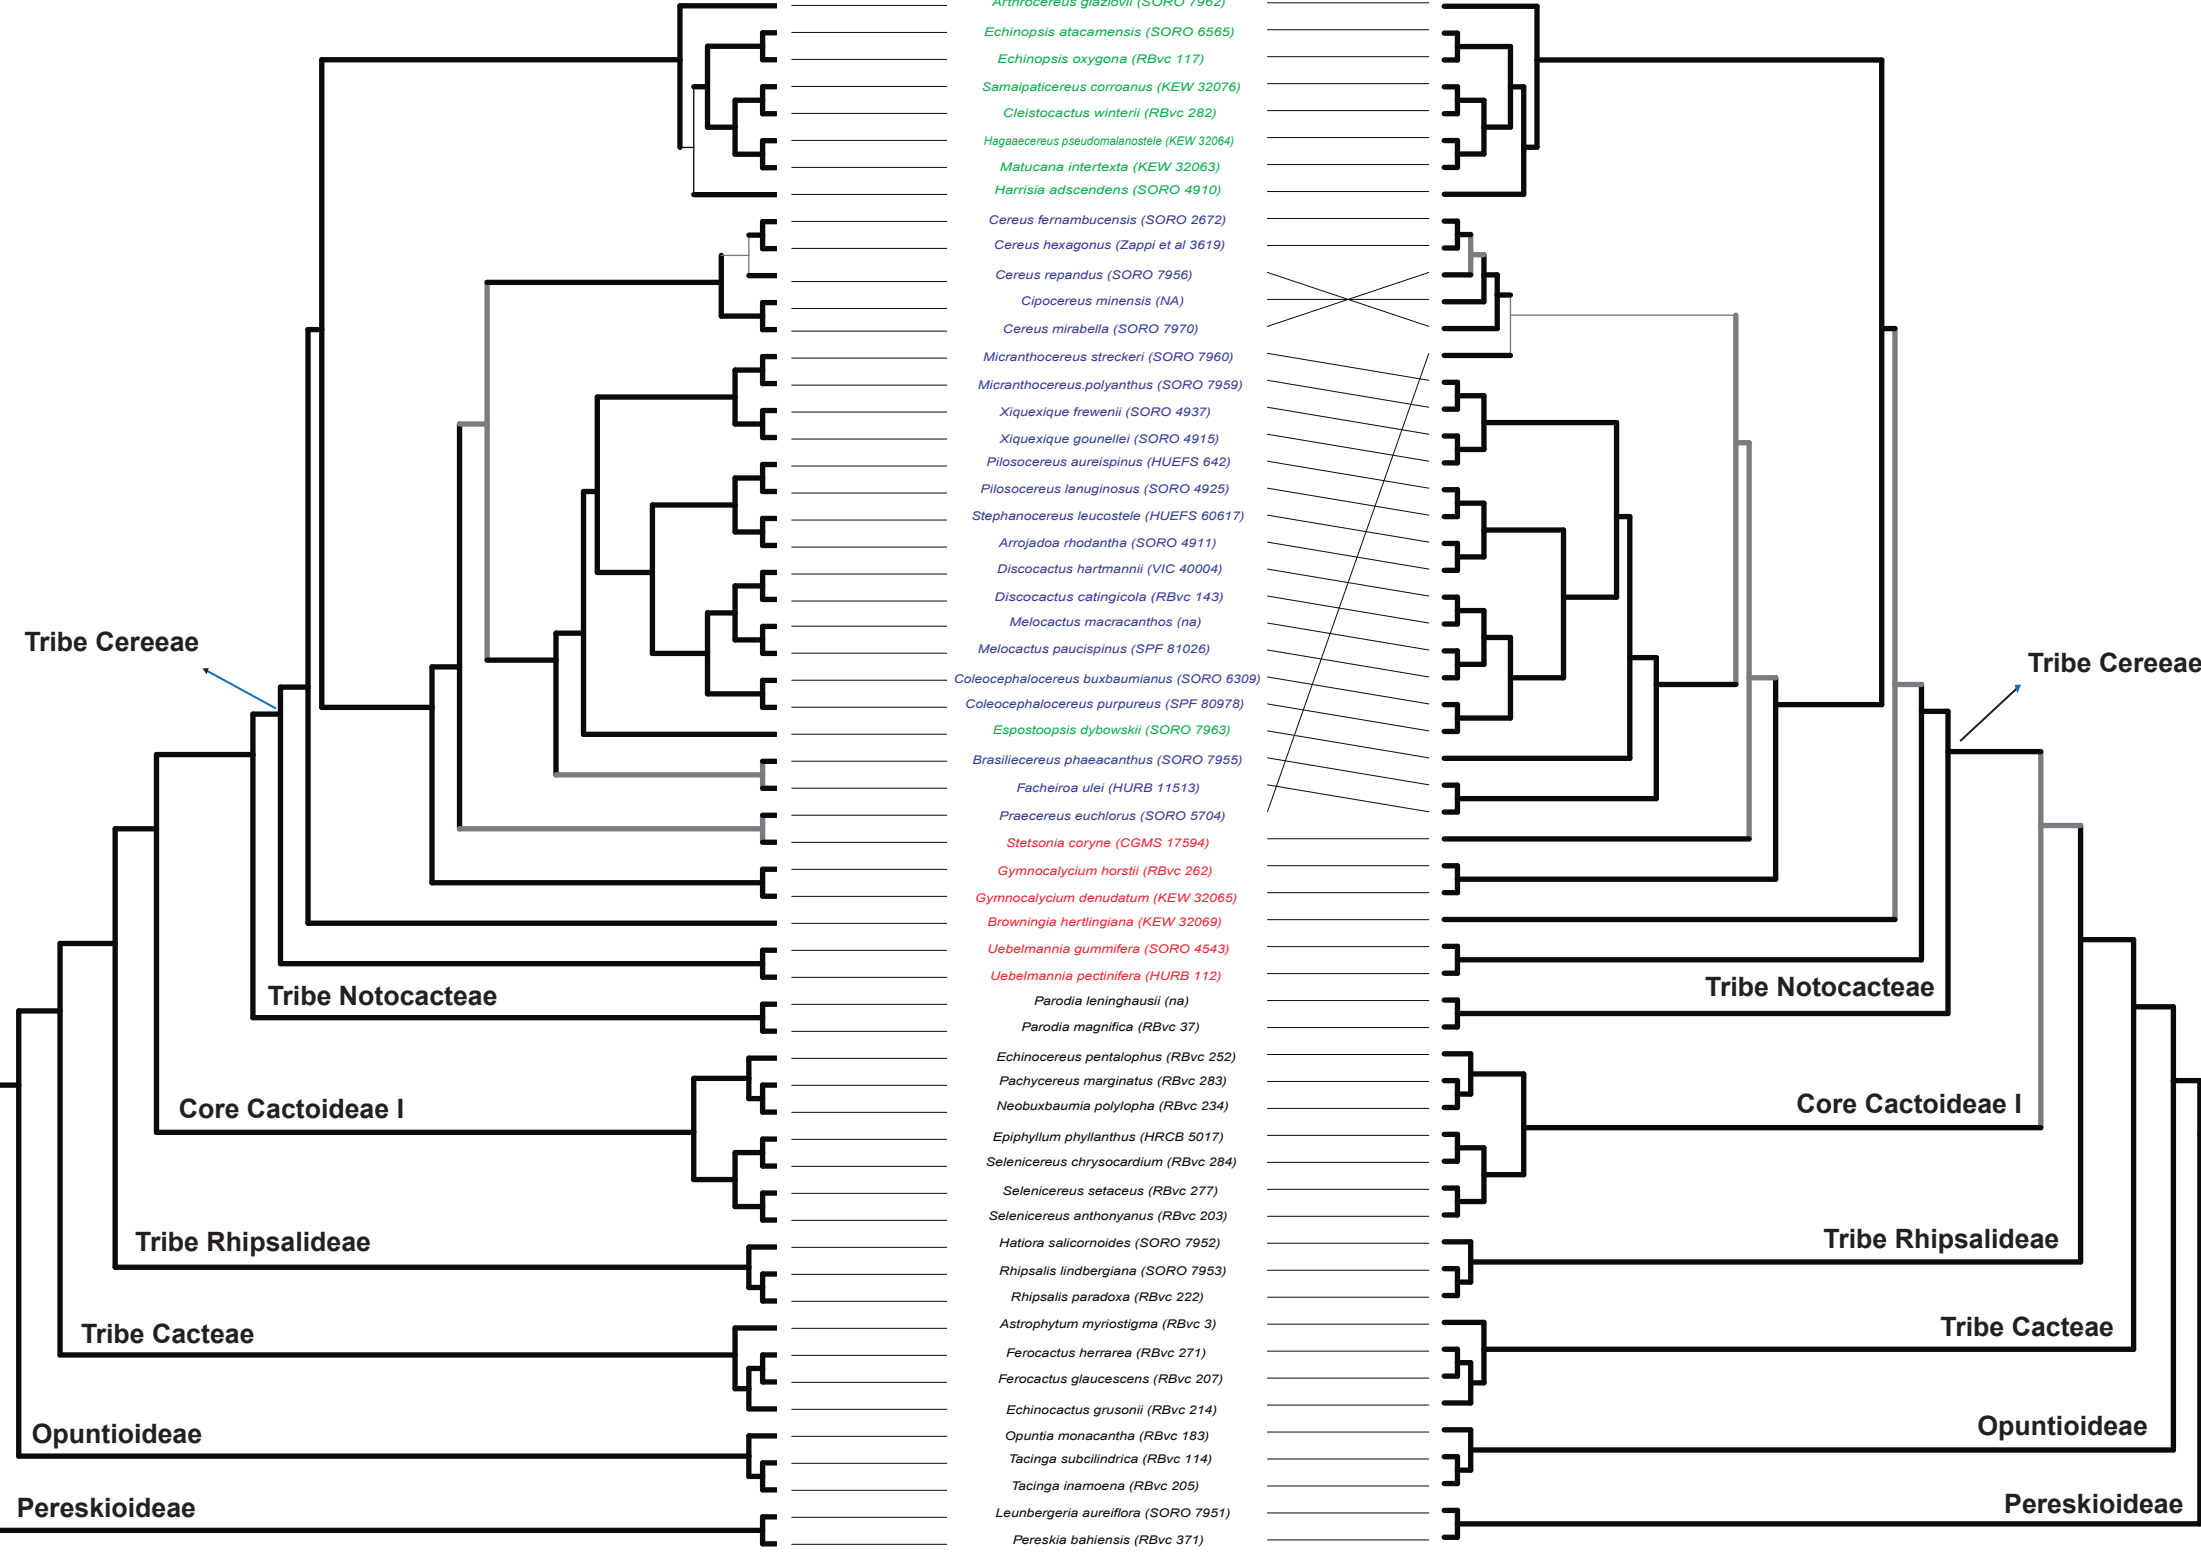

Supplement: s1 [file s1]
